# Supplementary material for: Assessing cellular efficacy of bromodomain inhibitors using fluorescence recovery after photobleaching
Source: PubMed Central journal article supplement (PMC4115480; doi:10.1186/1756-8935-7-14), 2014-07-13

**Additional File 1: Figure S1**

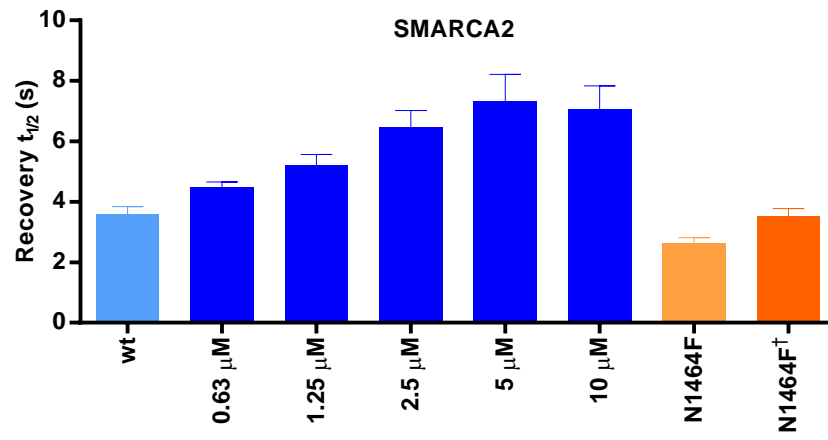

Supplement: 1756-8935-7-14-S1.pdf [file 1756-8935-7-14-S1.pdf]
