# Supplementary material for: Assessing cellular efficacy of bromodomain inhibitors using fluorescence recovery after photobleaching
Source: PubMed Central journal article supplement (PMC4115480; doi:10.1186/1756-8935-7-14), 2014-07-13
Supplement: 1756-8935-7-14-S7.pdf [file 1756-8935-7-14-S7.pdf]

**Additional File 7: Table S5**

| <b>Template</b>                       | <b>Primer</b> | <b>Sequence</b>                                                                                        | <b>pDONR</b>        | <b>Entry Clone</b>                              |
|---------------------------------------|---------------|--------------------------------------------------------------------------------------------------------|---------------------|-------------------------------------------------|
| pcDNA5/FRT/TO-eGFP-DEST/CREBBP        | 5'<br>3'      | ATGCCCAAGAAGAAGAGGAAAAGTCTCTCTCCAGCACACGACA<br>TCGGTCTTCCAAGTGGTTTCCCAGTCTT                            | N/A                 | N/A                                             |
| PCR product<br>(immediately above)    | 5'<br>3'      | GGGGACAAGTTTGTACAAAAAAGCAGGCTTAATGCCCAAGAAGAAGAGG<br>GGGGACAACCTTGTATAGAAAAGTTGGGTGTCGGTCTTCCAAGTGGTT  | pDONR221<br>P1-P4   | pENTR221 P1-P4/NLS/<br>CREBBP aa868-1341        |
| pcDNA5/FRT/TO-eGFP-DEST/CREBBP        | 5'<br>3'      | GGGGACAACCTTTCTATACAAAGTTGCTCTCCAGCACACGACACCA<br>GGGGACAACCTTATTATACAAAGTTGTTTCGGTCTTCCAAGTGGTT       | pDONR221<br>P4r-P3r | pENTR221 P4r-P3r/<br>CREBBP aa868-1341          |
| pcDNA5/FRT/TO-eGFP-DEST/CREBBP        | 5'<br>3'      | GGGGACAACCTTGTATAATAAAAGTTGCTCTCCAGCACACGACACCA<br>GGGGACCACCTTGTACAAGAAAGCTGGGTACTATCGGTCTTCCAAGTGGTT | pDONR221<br>P3-P2   | pENTR221 P3-P2/<br>CREBBP aa868-1341            |
| pcDNA5/FRT/TO-eGFP-DEST/ CREBBP N1168 | 5'<br>3'      | ATGCCCAAGAAGAAGAGGAAAAGTCTCTCTCCAGCACACGACA<br>TCGGTCTTCCAAGTGGTTTCCCAGTCTT                            | N/A                 | N/A                                             |
| PCR product<br>(immediately above)    | 5'<br>3'      | GGGGACAAGTTTGTACAAAAAAGCAGGCTTAATGCCCAAGAAGAAGAGG<br>GGGGACAACCTTGTATAGAAAAGTTGGGTGTCGGTCTTCCAAGTGGTT  | pDONR221<br>P1-P4   | pENTR221 P1-P4/NLS/<br>CREBBP aa868-1341 N1168F |
| pcDNA5/FRT/TO-eGFP-DEST/ CREBBP N1168 | 5'<br>3'      | GGGGACAACCTTTCTATACAAAGTTGCTCTCCAGCACACGACACCA<br>GGGGACAACCTTATTATACAAAGTTGTTTCGGTCTTCCAAGTGGTT       | pDONR221<br>P4r-P3r | pENTR221 P4r-P3r/CREBBP<br>aa868-1341           |
| pcDNA5/FRT/TO-eGFP-DEST/ CREBBP N1168 | 5'<br>3'      | GGGGACAACCTTGTATAATAAAAGTTGCTCTCCAGCACACGACACCA<br>GGGGACCACCTTGTACAAGAAAGCTGGGTACTATCGGTCTTCCAAGTGGTT | pDONR221<br>P3-P2   | pENTR221 P3-P2/ CREBBP<br>aa868-1341            |
